# Supplementary material for: Intact Proviral DNA Analysis of the Brain Viral Reservoir and Relationship to Neuroinflammation in People with HIV on Suppressive Antiretroviral Therapy
Source: MDPI journal article supplement (doi:10.3390/v15041009), 2023-04-20
Supplement: s1 [file s1]

**Supplemental Table 1.** Clinical and virological characteristics of the study cohort by HIVE score.

| Variable                                            | All participants<br>(n=28)  | HIVE score = 0<br>(n=19)  | HIVE score = 1 or 2<br>(n=9) | P value |
|-----------------------------------------------------|-----------------------------|---------------------------|------------------------------|---------|
| Age (years)                                         | 55.50 [50.00, 59.50]        | 54.00 [51.00, 62.00]      | 56.00 [50.00, 59.00]         | 0.7301  |
| Male gender, n (%)                                  | 22 (78.6)                   | 16 (84.2)                 | 6 (66.7)                     | 0.5731  |
| Race/ethnicity, n (%)                               |                             |                           |                              | 0.6987  |
| White                                               | 12 (42.9)                   | 9 (47.4)                  | 3 (33.3)                     |         |
| Black                                               | 11 (39.3)                   | 7 (36.8)                  | 4 (44.4)                     |         |
| Hispanic                                            | 4 (14.3)                    | 2 (10.5)                  | 2 (22.2)                     |         |
| Other                                               | 1 (3.6)                     | 1 (5.3)                   | 0 (0.0)                      |         |
| PMI (hours)                                         | 12.00 [5.88, 16.25]         | 12.00 [5.75, 15.50]       | 12.00 [8.00, 18.50]          | 0.4599  |
| Duration of HIV infection (years)                   | 17.00 [13.00, 21.50]        | 19.25 [10.75, 21.75]      | 17.00 [15.00, 19.00]         | 0.8772  |
| CD4 count (cells/μL)                                | 287.50 [126.25, 436.50]     | 292.00 [124.50, 446.00]   | 283.00 [136.00, 421.00]      | 0.9021  |
| CD4 nadir (cells/uL)                                | 98.00 [53.50, 147.50]       | 98.00 [56.50, 162.00]     | 98.00 [54.00, 125.00]        | 0.7306  |
| Plasma VL (copies/mL)                               | 40.00 [40.00, 40.00]        | 40.00 [40.00, 40.00]      | 40.00 [40.00, 72.00]         | 0.0867  |
| Time between last plasma VL and death (years)       | 0.40 [0.20, 0.62]           | 0.30 [0.20, 0.50]         | 0.40 [0.40, 0.70]            | 0.3326  |
| CSF VL (copies/mL)                                  | 40.00 [40.00, 40.00]        | 40.00 [40.00, 40.00]      | 40.00 [40.00, 88.25]         | 0.4617  |
| Time between last CSF VL and death (years)          | 0.30 [0.00, 1.00]           | 0.00 [0.00, 0.50]         | 0.95 [0.38, 1.62]            | 0.0675  |
| Maximum CSF VL in study (copies/mL)                 | 40.00 [40.00, 170.00]       | 40.00 [40.00, 170.00]     | 40.00 [40.00, 126.75]        | 0.7254  |
| Neurocognitive T score                              | 43.80 [37.27, 48.69]        | 46.50 [41.69, 50.14]      | 38.08 [28.92, 40.43]         | 0.0065  |
| HAND diagnosis, n (%)                               |                             |                           |                              | 0.0411  |
| MND                                                 | 2 (7.4)                     | 1 (5.6)                   | 1 (11.1)                     |         |
| HAD                                                 | 4 (14.8)                    | 1 (5.6)                   | 3 (33.3)                     |         |
| NPI-O                                               | 12 (44.4)                   | 7 (38.9)                  | 5 (55.6)                     |         |
| Normal                                              | 9 (33.3)                    | 9 (50.0)                  | 0 (0.0)                      |         |
| HIVE score, n (%)                                   |                             |                           |                              | <0.0001 |
| 0                                                   | 19 (67.9)                   | 19 (100.0)                | 0 (0.0)                      |         |
| 1                                                   | 7 (25.0)                    | 0 (0.0)                   | 7 (77.8)                     |         |
| 2                                                   | 2 (7.1)                     | 0 (0.0)                   | 2 (22.2)                     |         |
| Intact proviruses (cps/10 <sup>6</sup> cells)       | 10.00 [1.00, 91.96]         | 5.00 [1.00, 22.50]        | 55.97 [10.00, 158.22]        | 0.1071  |
| 3' defective proviruses (cps/10 <sup>6</sup> cells) | 508.71 [224.80, 857.78]     | 515.58 [237.38, 1,173.34] | 508.05 [82.76, 665.04]       | 0.4757  |
| 5' defective proviruses (cps/10 <sup>6</sup> cells) | 519.09 [273.18, 905.71]     | 468.47 [285.71, 1,049.49] | 559.22 [93.39, 694.41]       | 0.7122  |
| Total proviruses (cps/10 <sup>6</sup> cells)        | 1,063.93 [501.28, 2,074.33] | 990.70 [506.16, 2,309.48] | 1,188.52 [242.42, 1,631.00]  | 0.9412  |
| HIV gag DNA (cps/10 <sup>6</sup> cells)             | 8.71 [4.72, 13.13]          | 7.08 [3.71, 9.67]         | 13.00 [9.00, 15.73]          | 0.0193  |
| HIV gag RNA (cps/10 <sup>6</sup> cells)             | 7.45 [1.51, 27.92]          | 12.00 [2.80, 20.00]       | 2.80 [0.84, 45.24]           | 0.6064  |

All data are median [interquartile range] unless otherwise indicated. P values for two group comparisons were calculated using Fisher's exact test for categorical variables or Wilcoxon rank sum test for continuous variables. CSF VL within 18 months prior to death was not available for 15 individuals. HAND diagnosis was not available for 1 individual.

Abbreviations: ART, antiretroviral therapy; HAD, HIV-associated dementia; HAND, HIV-associated neurocognitive disorder; HIVE, HIV encephalitis; MND, mild neurocognitive disorder; NCI, neurocognitive impairment; NPI-O, neuropsychological impairment attributable to other causes; PMI, post-mortem interval; VL, viral load.
