# Supplementary material for: Intact Proviral DNA Analysis of the Brain Viral Reservoir and Relationship to Neuroinflammation in People with HIV on Suppressive Antiretroviral Therapy
Source: MDPI journal article supplement (doi:10.3390/v15041009), 2023-04-20
Supplement: s1 [file s1]

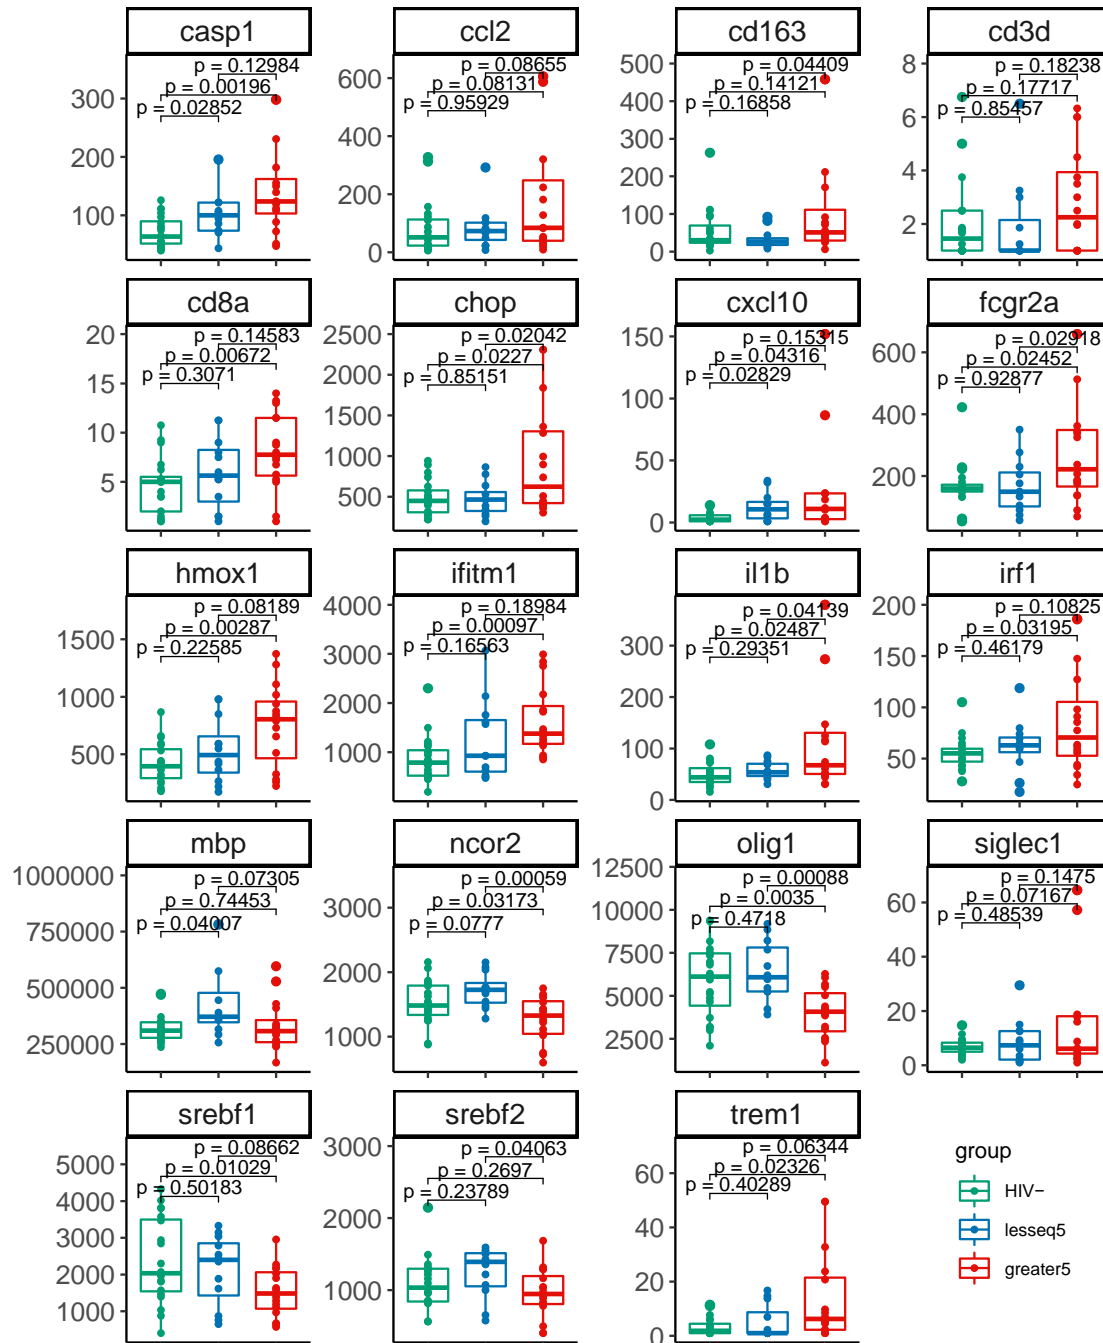

**Supplemental Figure S1. Differential expression of genes related to neuroinflammation and white matter integrity in brain tissue from 28 HIV+ individuals on ART groups stratified by HIV status and level of intact proviruses.** Horizontal bars represent medians, boxes span the interquartile range (IQR), and whiskers extend to extreme data points within 1.5 times the IQR. P values calculated using Welch's t test (n = 20 HIV-, n = 12 HIV+ with intact proviruses  $\leq 5$  copies per  $10^6$  cells, n = 16 HIV+ with intact proviruses  $>5$  copies per  $10^6$  cells).
